# Supplementary material for: An uncharacterized FMAG_01619 protein from Fusobacterium mortiferum ATCC 9817 demonstrates that some bacterial macrodomains can also act as poly-ADP-ribosylhydrolases
Source: PubMed Central journal article supplement (PMC6397177; doi:10.1038/s41598-019-39691-4), 2019-03-01
Supplement: 41598_2019_39691_MOESM1_ESM.pdf [file 41598_2019_39691_MOESM1_ESM.pdf]

## Supplementary Information

**An uncharacterized FMAG\_01619 protein from *Fusobacterium mortiferum* ATCC 9817 demonstrates that some bacterial macrodomains can also act as poly-ADP-ribosylhydrolases**

### Authors:

Antonio Ginés García-Saura<sup>1,2</sup>, Rubén Zapata-Pérez<sup>1,2</sup>, José Francisco-Hidalgo<sup>1</sup>, Juana Cabanes<sup>1,2</sup>, Fernando Gil-Ortiz<sup>3</sup>, & Álvaro Sánchez-Ferrer<sup>1,2,\*</sup>

### Affiliations:

<sup>1</sup>Department of Biochemistry and Molecular Biology-A, Faculty of Biology, Regional Campus of International Excellence "Campus Mare Nostrum", University of Murcia, Campus Espinardo, E-30100 Murcia, Spain.

<sup>2</sup>Murcia Biomedical Research Institute (IMIB-Arrixaca), 30120 Murcia, Spain.

<sup>3</sup>CELLS-ALBA Synchrotron Light Source, 08290 Barcelona, Spain.

\*Corresponding author A.S-F.; [alvaro@um.es](mailto:alvaro@um.es).

| UniProt code | Superkingdom | Class          | UniProt code | Superkingdom | Class             | UniProt code | Superkingdom | Class           |
|--------------|--------------|----------------|--------------|--------------|-------------------|--------------|--------------|-----------------|
| A0A015JVI8   | Eukaryota    | Glomeromycetes | A0A182XAQ7   | Eukaryota    | Insecta           | B4KUL0       | Eukaryota    | Insecta         |
| A0A015L9B9   | Eukaryota    | Glomeromycetes | A0A182Y6J2   | Eukaryota    | Insecta           | B4KUL1       | Eukaryota    | Insecta         |
| A0A023EGP6   | Eukaryota    | Insecta        | A0A1A7Y1C5   | Eukaryota    | Actinopteri       | B4LHA0       | Eukaryota    | Insecta         |
| A0A024RCY9   | Eukaryota    | Mammalia       | A0A1A7ZTR8   | Eukaryota    | Actinopteri       | B4LHA1       | Eukaryota    | Insecta         |
| A0A034W9I7   | Eukaryota    | Insecta        | A0A1A8BZF2   | Eukaryota    | Actinopteri       | B4ML61       | Eukaryota    | Insecta         |
| A0A034WNF1   | Eukaryota    | Insecta        | A0A1A8H487   | Eukaryota    | Actinopteri       | B4ML62       | Eukaryota    | Insecta         |
| A0A060X8B0   | Eukaryota    | Actinopteri    | A0A1A8J6Z8   | Eukaryota    | Actinopteri       | B4PE65       | Eukaryota    | Insecta         |
| A0A060XB39   | Eukaryota    | Actinopteri    | A0A1A8JYN2   | Eukaryota    | Actinopteri       | B4PE66       | Eukaryota    | Insecta         |
| A0A084WTT0   | Eukaryota    | Insecta        | A0A1A8NDW0   | Eukaryota    | Actinopteri       | B4QJP0       | Eukaryota    | Insecta         |
| A0A087QPT6   | Eukaryota    | Aves           | A0A1A8NPN7   | Eukaryota    | Actinopteri       | B5DQB2       | Eukaryota    | Insecta         |
| A0A087V5U1   | Eukaryota    | Aves           | A0A1A9VE62   | Eukaryota    | Insecta           | B5XAV3       | Eukaryota    | Actinopteri     |
| A0A087XPI2   | Eukaryota    | Actinopteri    | A0A1A9WHJ4   | Eukaryota    | Insecta           | B5XC46       | Eukaryota    | Actinopteri     |
| A0A091EAC0   | Eukaryota    | Aves           | A0A1A9XTT7   | Eukaryota    | Insecta           | B5XH19       | Eukaryota    | Actinopteri     |
| A0A091GNC9   | Eukaryota    | Aves           | A0A1B0ABA9   | Eukaryota    | Insecta           | C1BK61       | Eukaryota    | Actinopteri     |
| A0A091H0Q4   | Eukaryota    | Aves           | A0A1B0C5Q7   | Eukaryota    | Insecta           | C1BYN2       | Eukaryota    | Actinopteri     |
| A0A091I9B7   | Eukaryota    | Aves           | A0A1B0FEV8   | Eukaryota    | Insecta           | C3KJW8       | Eukaryota    | Actinopteri     |
| A0A091J3D0   | Eukaryota    | Aves           | A0A1D1XP44   | Eukaryota    | Liliopsida        | C4N157       | Eukaryota    | Insecta         |
| A0A091LWX2   | Eukaryota    | Aves           | A0A1I8M674   | Eukaryota    | Insecta           | C9JNE2       | Eukaryota    | Mammalia        |
| A0A091NLI8   | Eukaryota    | Aves           | A0A1I8M681   | Eukaryota    | Insecta           | D3TRI6       | Eukaryota    | Insecta         |
| A0A091Q3N4   | Eukaryota    | Aves           | A0A1I8N607   | Eukaryota    | Insecta           | E2RDL6       | Eukaryota    | Mammalia        |
| A0A091QK04   | Eukaryota    | Aves           | A0A1I8NP22   | Eukaryota    | Insecta           | E3TCM6       | Eukaryota    | Actinopteri     |
| A0A091R1U2   | Eukaryota    | Aves           | A0A1I8NP24   | Eukaryota    | Insecta           | F1RVM0       | Eukaryota    | Mammalia        |
| A0A091SR03   | Eukaryota    | Aves           | A0A1I8NP37   | Eukaryota    | Insecta           | F6PKH2       | Eukaryota    | Mammalia        |
| A0A091U9L7   | Eukaryota    | Aves           | A0A1I8P6B7   | Eukaryota    | Insecta           | F6QE50       | Eukaryota    | Mammalia        |
| A0A091V358   | Eukaryota    | Aves           | A0A1J1IY07   | Eukaryota    | Insecta           | F7FAW5       | Eukaryota    | Mammalia        |
| A0A091VEF7   | Eukaryota    | Aves           | A0A1L1RUZ7   | Eukaryota    | Aves              | G1KSP4       | Eukaryota    | <i>Reptilia</i> |
| A0A093BYP2   | Eukaryota    | Aves           | A0A1Q3ZEF9   | Eukaryota    | Insecta           | G1LCR6       | Eukaryota    | Mammalia        |
| A0A093D3N6   | Eukaryota    | Aves           | A0A1Q3EZI5   | Eukaryota    | Insecta           | G1NCP3       | Eukaryota    | Aves            |
| A0A093ERG2   | Eukaryota    | Aves           | A0A1R2CA94   | Eukaryota    | Heterotrichea     | G1PI05       | Eukaryota    | Mammalia        |
| A0A093FXD0   | Eukaryota    | Aves           | A0A1S3FE19   | Eukaryota    | Mammalia          | G1QYU5       | Eukaryota    | Mammalia        |
| A0A093GX46   | Eukaryota    | Aves           | A0A1S3FEL9   | Eukaryota    | Mammalia          | G1T6M3       | Eukaryota    | Mammalia        |
| A0A093HAJ0   | Eukaryota    | Aves           | A0A1S3JUL0   | Eukaryota    | Lingulata         | G3I9V6       | Eukaryota    | Mammalia        |
| A0A093INU1   | Eukaryota    | Aves           | A0A1S3LM95   | Eukaryota    | Actinopteri       | G3NGE6       | Eukaryota    | Actinopteri     |
| A0A093IZJ9   | Eukaryota    | Aves           | A0A1S3WK17   | Eukaryota    | Mammalia          | G3QZH7       | Eukaryota    | Mammalia        |
| A0A093P5H3   | Eukaryota    | Aves           | A0A1U7S3Y4   | Eukaryota    | <i>Sauropsida</i> | G3WZY9       | Eukaryota    | Mammalia        |
| A0A093S129   | Eukaryota    | Aves           | A0A1U7TR99   | Eukaryota    | Mammalia          | G7MP92       | Eukaryota    | Mammalia        |
| A0A094LCI2   | Eukaryota    | Aves           | A0A1V4KWP5   | Eukaryota    | Aves              | G7P3F2       | Eukaryota    | Mammalia        |
| A0A096MGH1   | Eukaryota    | Actinopteri    | A0A1W4UX02   | Eukaryota    | Insecta           | G9L242       | Eukaryota    | Mammalia        |
| A0A096NI15   | Eukaryota    | Mammalia       | A0A1W4V8W4   | Eukaryota    | Insecta           | H0VQQ5       | Eukaryota    | Mammalia        |
| A0A099ZF20   | Eukaryota    | Aves           | A0A1W4V9B2   | Eukaryota    | Insecta           | H0YUB7       | Eukaryota    | Aves            |
| A0A0A0AR11   | Eukaryota    | Aves           | A0A1W4VA97   | Eukaryota    | Insecta           | H2PIZ4       | Eukaryota    | Mammalia        |

|            |           |                       |            |           |                    |        |           |                      |
|------------|-----------|-----------------------|------------|-----------|--------------------|--------|-----------|----------------------|
| A0A0A1WIE8 | Eukaryota | Insecta               | A0A1W4ZFA3 | Eukaryota | Actinopteri        | H2QSY7 | Eukaryota | Mammalia             |
| A0A0A1XPZ2 | Eukaryota | Insecta               | A0A210Q7K8 | Eukaryota | Bivalvia           | H3B883 | Eukaryota | <i>Sarcopterygii</i> |
| A0A0B7A2D5 | Eukaryota | Gastropoda            | A0A218UDT5 | Eukaryota | Aves               | H3FC23 | Eukaryota | Chromadorea          |
| A0A0D9RFK9 | Eukaryota | Mammalia              | A0A250XV93 | Eukaryota | Mammalia           | I3MKR2 | Eukaryota | Mammalia             |
| A0A0G2K831 | Eukaryota | Mammalia              | A0A267FHB4 | Eukaryota | <i>Turbellaria</i> | K7G427 | Eukaryota | <i>Sauropsida</i>    |
| A0A0J9RZ64 | Eukaryota | Insecta               | A0A2B4RU11 | Eukaryota | Anthozoa           | K9IWI2 | Eukaryota | Mammalia             |
| A0A0K8TKW3 | Eukaryota | Insecta               | A0A2D0SKZ0 | Eukaryota | Actinopteri        | M4APZ1 | Eukaryota | Actinopteri          |
| A0A0K8UXJ4 | Eukaryota | Insecta               | A0A2H5TLZ2 | Eukaryota | Glomeromycetes     | M7B3B1 | Eukaryota | <i>Sauropsida</i>    |
| A0A0K8V948 | Eukaryota | Insecta               | A0A2I0LNM5 | Eukaryota | Aves               | Q16MT6 | Eukaryota | Insecta              |
| A0A0K8W5U9 | Eukaryota | Insecta               | A0A2I2UHL6 | Eukaryota | Mammalia           | Q1LZ74 | Eukaryota | Mammalia             |
| A0A0M4F1L3 | Eukaryota | Insecta               | A0A2I4BF28 | Eukaryota | Actinopteri        | Q2LYQ9 | Eukaryota | Insecta              |
| A0A0P4WSK8 | Eukaryota | Malacostraca          | A0A2J8NZK2 | Eukaryota | Mammalia           | Q3UG43 | Eukaryota | Mammalia             |
| A0A0Q3TD29 | Eukaryota | Aves                  | A0A2J8NZL1 | Eukaryota | Mammalia           | Q4S5Q8 | Eukaryota | Actinopteri          |
| A0A0Q5UGK9 | Eukaryota | Insecta               | A0A2J8Y3X2 | Eukaryota | Mammalia           | Q503C5 | Eukaryota | Actinopteri          |
| A0A0Q5UKT9 | Eukaryota | Insecta               | A0A2J8Y415 | Eukaryota | Mammalia           | Q5ZHP2 | Eukaryota | Aves                 |
| A0A0R1DYV8 | Eukaryota | Insecta               | A0A2K5CG67 | Eukaryota | Mammalia           | Q7QCF5 | Eukaryota | Insecta              |
| A0A0R1E7E7 | Eukaryota | Insecta               | A0A2K5JC22 | Eukaryota | Mammalia           | Q8IPU1 | Eukaryota | Insecta              |
| A0A0R1E7Z5 | Eukaryota | Insecta               | A0A2K5KRI1 | Eukaryota | Mammalia           | Q8R5F3 | Eukaryota | Mammalia             |
| A0A0R1EDI3 | Eukaryota | Insecta               | A0A2K5Q2B6 | Eukaryota | Mammalia           | Q9VP69 | Eukaryota | Insecta              |
| A0A0S4JUK8 | Eukaryota | <i>Kinetoplastida</i> | A0A2K6AHN6 | Eukaryota | Mammalia           | Q9Y530 | Eukaryota | Mammalia             |
| A0A147A659 | Eukaryota | Actinopteri           | A0A2K6DFJ8 | Eukaryota | Mammalia           | R7VN48 | Eukaryota | Aves                 |
| A0A151P4N8 | Eukaryota | <i>Sauropsida</i>     | A0A2K6F9D2 | Eukaryota | Mammalia           | T1DQZ8 | Eukaryota | Insecta              |
| A0A182FT06 | Eukaryota | Insecta               | A0A2K6KEJ3 | Eukaryota | Mammalia           | U3I4Z9 | Eukaryota | Aves                 |
| A0A182HSJ9 | Eukaryota | Insecta               | A0A2K6PI01 | Eukaryota | Mammalia           | U3JMS7 | Eukaryota | Aves                 |
| A0A182JHK5 | Eukaryota | Insecta               | A0A2K6SLX6 | Eukaryota | Mammalia           | U5ET22 | Eukaryota | Insecta              |
| A0A182JYR1 | Eukaryota | Insecta               | A8JNW5     | Eukaryota | Insecta            | V9KT55 | Eukaryota | Chondrichthyes       |
| A0A182LEL7 | Eukaryota | Insecta               | B0XBB0     | Eukaryota | Insecta            | V9L100 | Eukaryota | Chondrichthyes       |
| A0A182LUR2 | Eukaryota | Insecta               | B3M6T3     | Eukaryota | Insecta            | V9LA13 | Eukaryota | Chondrichthyes       |
| A0A182NRH1 | Eukaryota | Insecta               | B3M6T4     | Eukaryota | Insecta            | V9LJR8 | Eukaryota | Chondrichthyes       |
| A0A182PCC8 | Eukaryota | Insecta               | B3NIW5     | Eukaryota | Insecta            | W4YUH7 | Eukaryota | Echinoidea           |
| A0A182QLX2 | Eukaryota | Insecta               | B3NIW6     | Eukaryota | Insecta            | W5JUF1 | Eukaryota | Insecta              |
| A0A182RLE2 | Eukaryota | Insecta               | B4IAK7     | Eukaryota | Insecta            | W5L9A9 | Eukaryota | Actinopteri          |
| A0A182TGW9 | Eukaryota | Insecta               | B4ITH3     | Eukaryota | Insecta            | W5N3S1 | Eukaryota | Actinopteri          |
| A0A182VKF8 | Eukaryota | Insecta               | B4J139     | Eukaryota | Insecta            | W5NRT3 | Eukaryota | Mammalia             |
| A0A182W0W2 | Eukaryota | Insecta               | B4J140     | Eukaryota | Insecta            | W8B6Q8 | Eukaryota | Insecta              |

**Supplementary Table S1.** Eukaryotic TARG1-like sequences found in NCBI non-redundant (NR) and UniProt databases. These sequences were used in the phylogenetic analysis of Fig. 2. Sequences in italics represent the taxonomic level of Order.

| UniProt code | Superkingdom | Class                | species                                                    |
|--------------|--------------|----------------------|------------------------------------------------------------|
| A0A089HU69   | Bacteria     | Bacilli              | <i>Paenibacillus durus</i>                                 |
| A0A089IBX6   | Bacteria     | Bacilli              | <i>Paenibacillus sp.</i> FSL H7-0357                       |
| A0A089J1F3   | Bacteria     | Bacilli              | <i>Paenibacillus durus</i>                                 |
| A0A089LZ90   | Bacteria     | Bacilli              | <i>Paenibacillus stellifer</i>                             |
| A0A0A2UAG7   | Bacteria     | Bacilli              | <i>Paenibacillus sp.</i> MAEPY2                            |
| A0A0B5AXM2   | Bacteria     | Bacilli              | <i>Jeotgalibacillus malaysiensis</i>                       |
| A0A0G0CQ63   | Bacteria     | <u>Candidatus</u>    | <i>candidate division</i> TM6 bacterium GW2011_GWF2_33_332 |
| A0A0Q7T4C6   | Bacteria     | Bacilli              | <i>Paenibacillus sp.</i> Root52                            |
| A0A0R1XH32   | Bacteria     | Bacilli              | <i>Lactobacillus harbinensis</i> DSM 16991                 |
| A0A1B2DGN8   | Bacteria     | Bacilli              | <i>Paenibacillus sp.</i> BIHB4019                          |
| A0A1C5N978   | Bacteria     | Clostridia           | <i>uncultured Clostridium sp.</i>                          |
| A0A1G5EWD0   | Bacteria     | Clostridia           | <i>Ruminococcus bromii</i>                                 |
| A0A1G5FHU0   | Bacteria     | Bacilli              | <i>Paenibacillus polysaccharolyticus</i>                   |
| A0A1G6RQD2   | Bacteria     | Bacilli              | <i>Paenibacillus sp.</i> CF095                             |
| A0A1H3S2B1   | Bacteria     | Bacilli              | <i>Thermoactinomyces sp.</i> DSM 45892                     |
| A0A1H8B9R9   | Bacteria     | Bacilli              | <i>Paenibacillus sp.</i> OK076                             |
| A0A1R1FDX5   | Bacteria     | Bacilli              | <i>Paenibacillus sp.</i> FSL R5-0765                       |
| A0A1S2L2Y3   | Bacteria     | Bacilli              | <i>Anaerobacillus sp.</i> NB2006                           |
| A0A1V4G637   | Bacteria     | Bacilli              | <i>Paenibacillus sp.</i> VT-16-81                          |
| A0A1V5SB14   | Bacteria     | <u>Bacteroidetes</u> | <i>Bacteroidetes bacterium</i> ADurb.Bin302                |
| A0A209DKE5   | Bacteria     | Bacilli              | <i>Saccharibacillus sp.</i> O16                            |
| A0A264DW85   | Bacteria     | Bacilli              | <i>Paenibacillus taichungensis</i>                         |
| A0A268AZ29   | Bacteria     | Bacilli              | <i>Paenibacillus sp.</i> 7523-1                            |
| A0A268SI35   | Bacteria     | Bacilli              | <i>Paenibacillus sp.</i> 7516                              |
| A0A2E3BYV5   | Bacteria     | Alphaproteobacteria  | <i>Magnetococcales bacterium</i>                           |
| A0A2G7LZ77   | Bacteria     | Bacilli              | <i>Paenibacillus sp.</i> LK1                               |
| C3WDV1       | Bacteria     | Fusobacteriia        | <i>Fusobacterium mortiferum</i> ATCC 9817                  |
| N1ZQV1       | Bacteria     | Clostridia           | <i>Eubacterium plexicaudatum</i> ASF492                    |
| R9KG45       | Bacteria     | Clostridia           | <i>Lachnospiraceae bacterium</i> A2                        |
| R9KYR0       | Bacteria     | Clostridia           | <i>Lachnospiraceae bacterium</i> COE1                      |
| U4TVH3       | Bacteria     | Bacilli              | <i>Lactobacillus shenzhenensis</i> LY-73                   |
| W4ANJ1       | Bacteria     | Bacilli              | <i>Paenibacillus sp.</i> FSL R5-192                        |
| WP_027129123 | Bacteria     | Fusobacteriia        | <i>Fusobacterium perfoetens</i>                            |

**Supplementary Table S2.** Bacterial TARG1-like sequences found in NCBI non-redundant (NR) and UniProt databases. These sequences were used in the phylogenetic analysis of Fig. 3. Sequences underlined represent not fully classified bacteria.

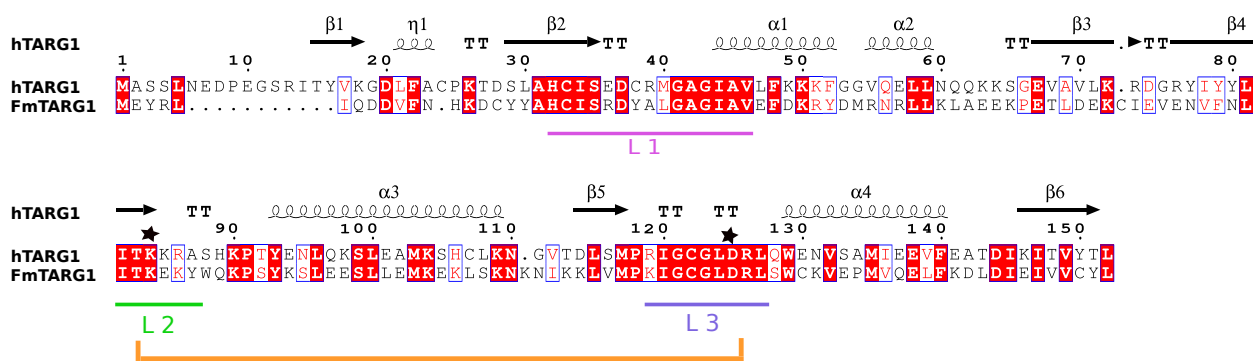

**TKx(30,35)Px[IL]GxGxD**

**Supplementary Figure S1.** The structure-based sequence alignment of FmTARG1 and hTARG1 sequences. The symbols and legends are the same as in Fig. 1.

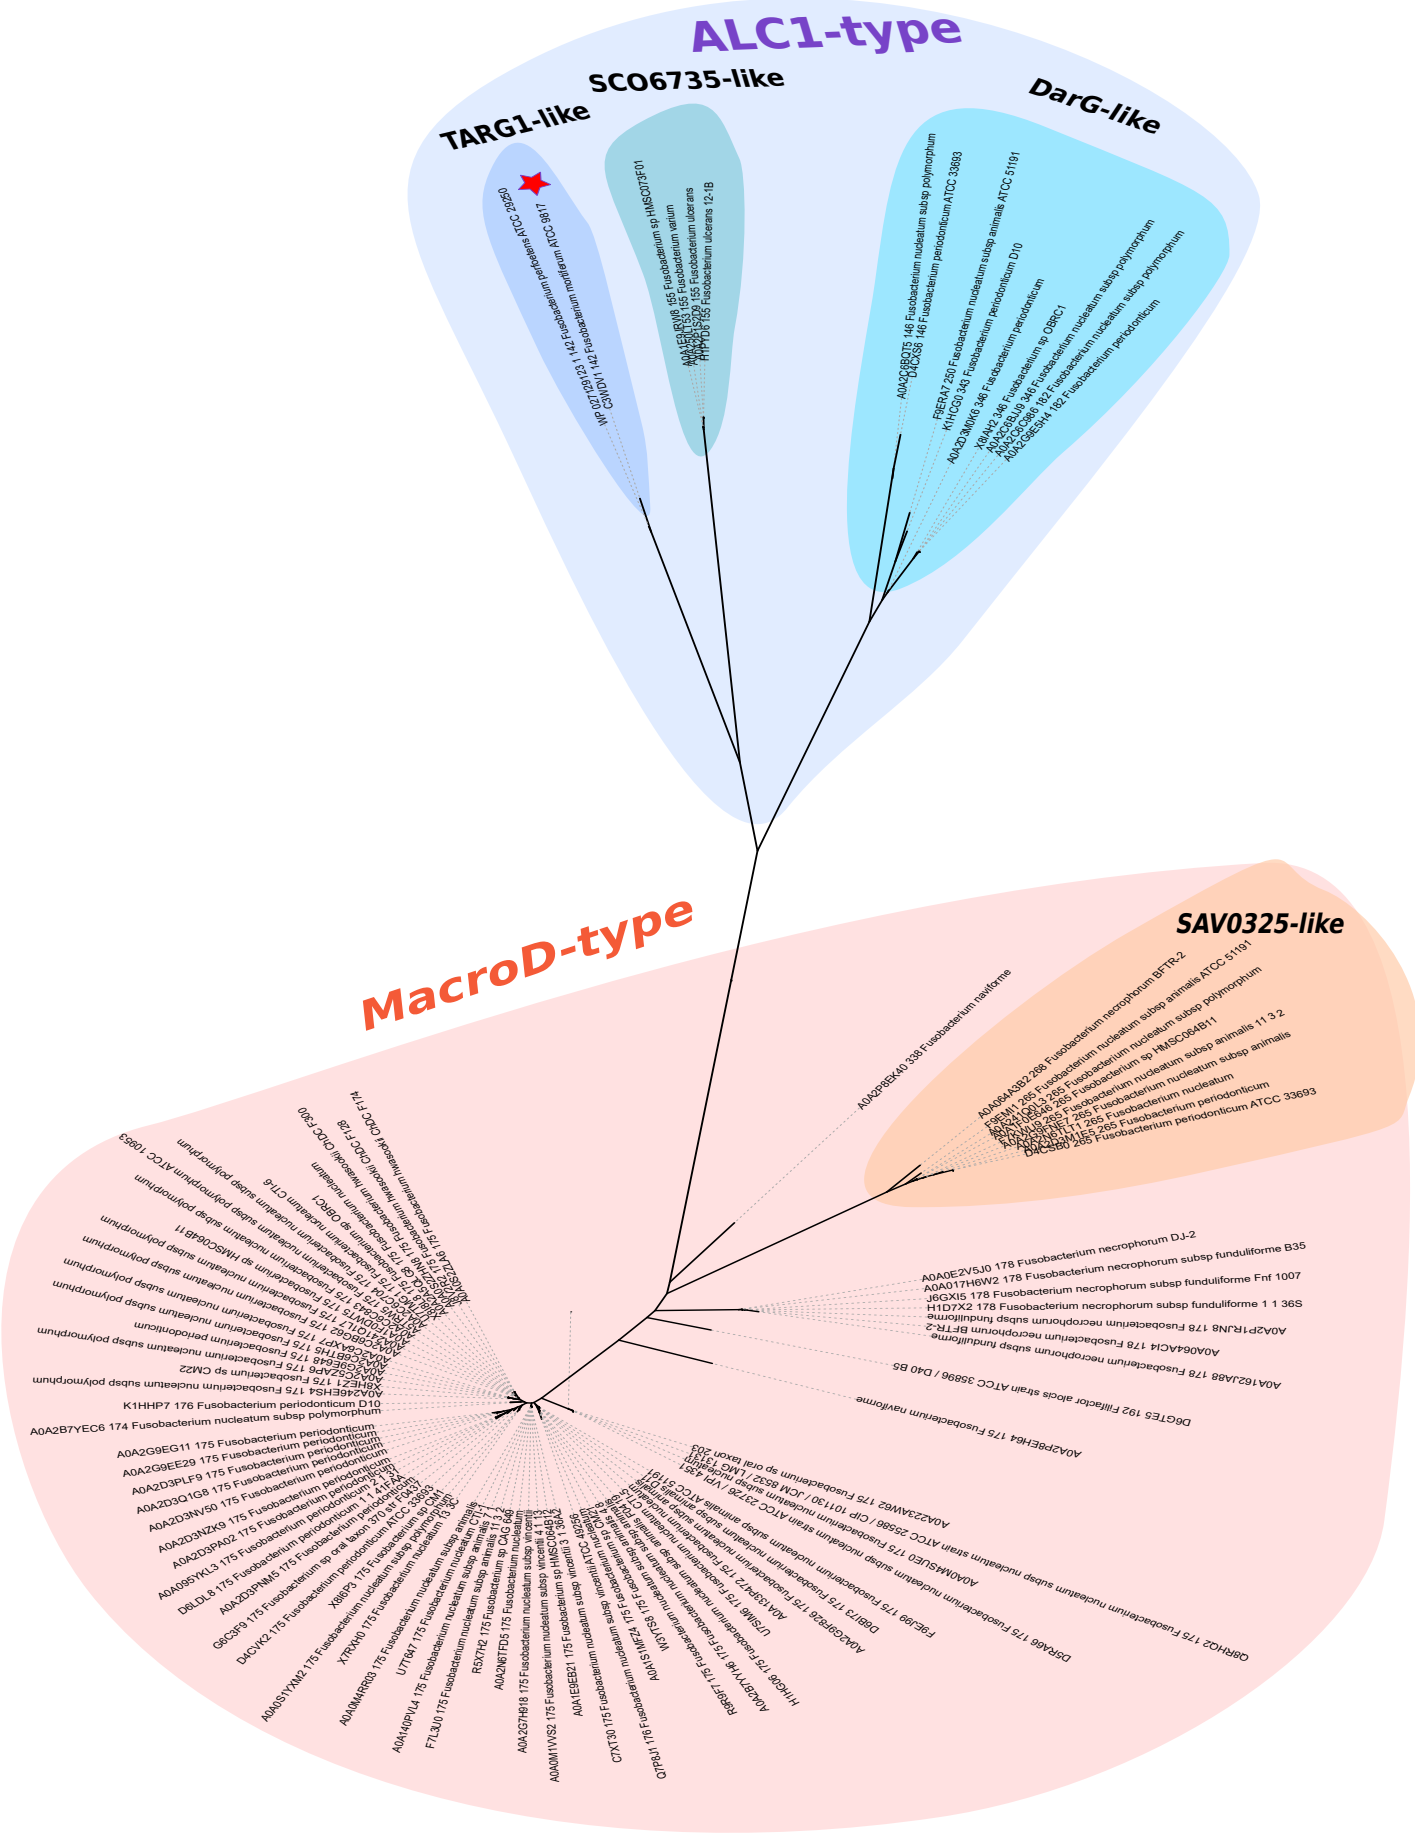

**Supplementary Figure S2.** Phylogenetic tree of *Fusobacterium* macrodomains. The neighbour-joining tree with the 94 sequences found in UniProt and NCBI databases was constructed using 1000 replicates. MacroD-type macrodomains (red) are most abundant, although ALC1-type macrodomain (blue) sequences are also found, including TARG1-, SCO6735- and DarG-like macrodomains, respectively. The *F. mortiferum* ATCC 9817 TARG1 macrodomain is marked with a red star.

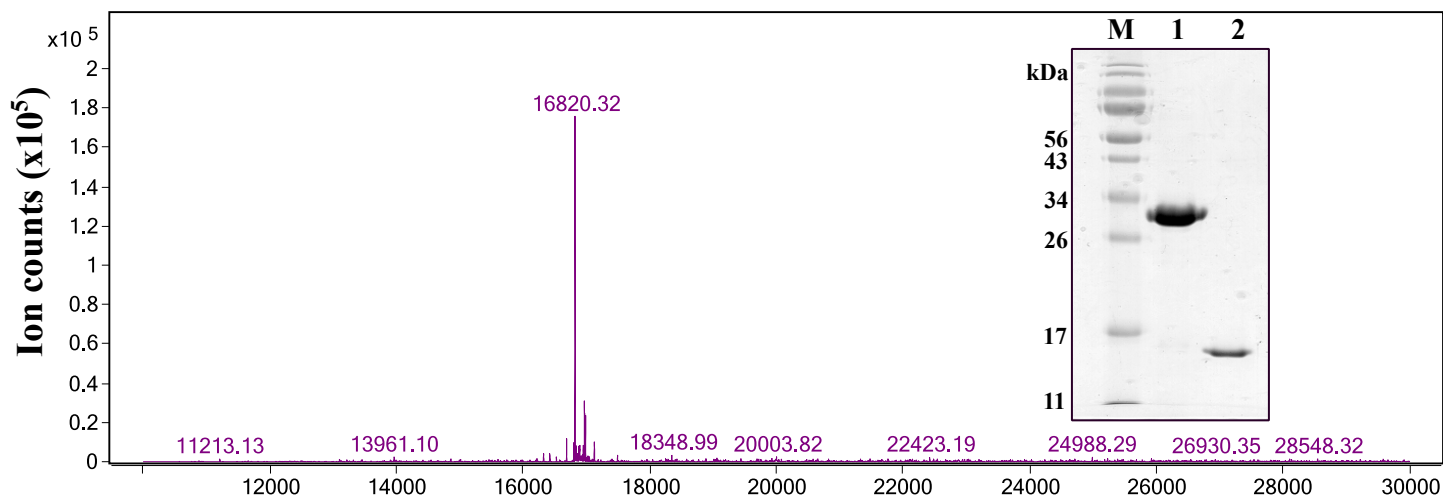

**Supplementary Figure S3.** Purification of FmTARG1. Mass spectra of purified FmTARG1 showed a molecular mass of 16820.32 Da. Insert. SDS-PAGE (15 %) gel of FmTARG1 purification process. Molecular mass standards (M) (kDa) are indicated in the left margin (EZ-Run<sup>TM</sup> Pre-Stained *Rec* Protein ladder, Fisher). AFV-FmTARG1 and FmTARG1 proteins are shown as a band of about 30 kDa (lane 1) and 16 kDa (lane 2), respectively.

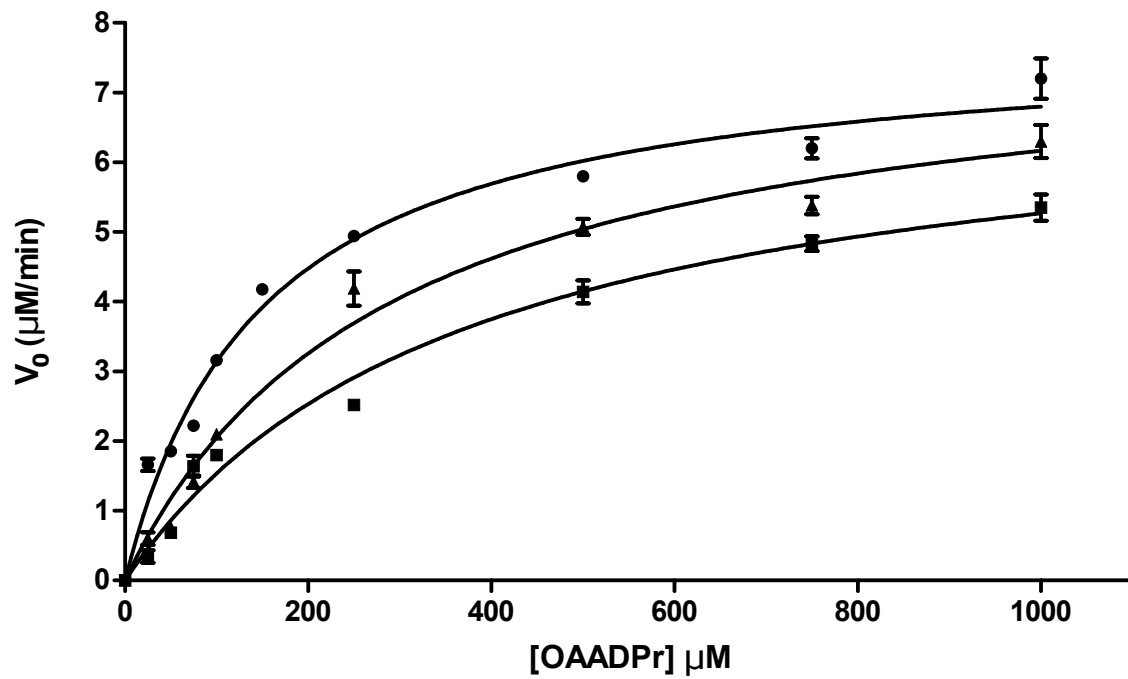

**Supplementary Figure S4.** FmTARG1 activity towards O-acetyl-ADP-ribose. The steady-state kinetic of FmTARG1 (●) was also compared with hTARG1 (■) at a fixed enzyme concentration (0.2  $\mu\text{M}$ ). The inhibitory effect by ADPr on the deacetylation reaction of OAADPr was studied at 200  $\mu\text{M}$  (▲).



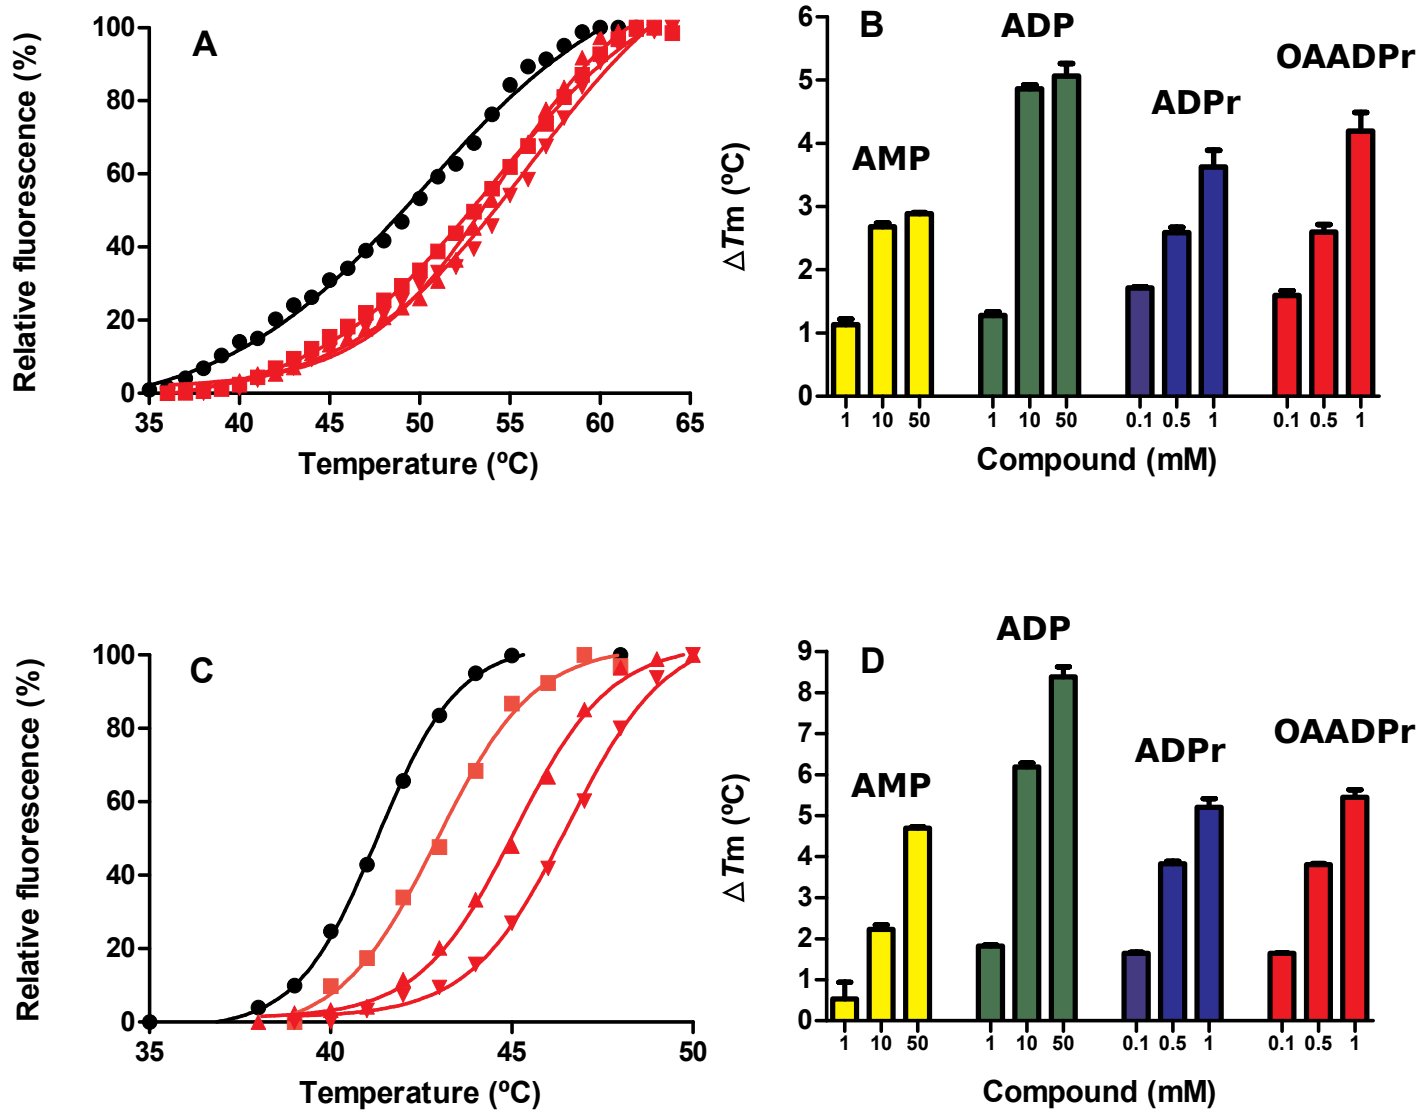

**Supplementary Figure S5.** Thermal shift assay of FmTARG1 and hTARG1. (A) Melting temperature curves of FmTARG1 in 50 mM sodium phosphate buffer pH 7.0 (●) and in the presence of different OAADPr concentrations: 0.1 mM (■), 0.5 mM (▲) 1 mM (▼). (B) Increment in melting temperature ( $\Delta T_m$ ) of FmTARG1 in the presence of different ADPr analogues. The compound used were AMP and ADP at 1-50 mM, and ADPr and OAADPr at 0.1-1 mM. (C) Melting temperature curves of hTARG1. (D) Increment in melting temperature ( $\Delta T_m$ ) of hTARG1 in the presence of different ADPr analogues. The conditions and concentrations used for hTARG1 were the same as for FmTARG1.

**A**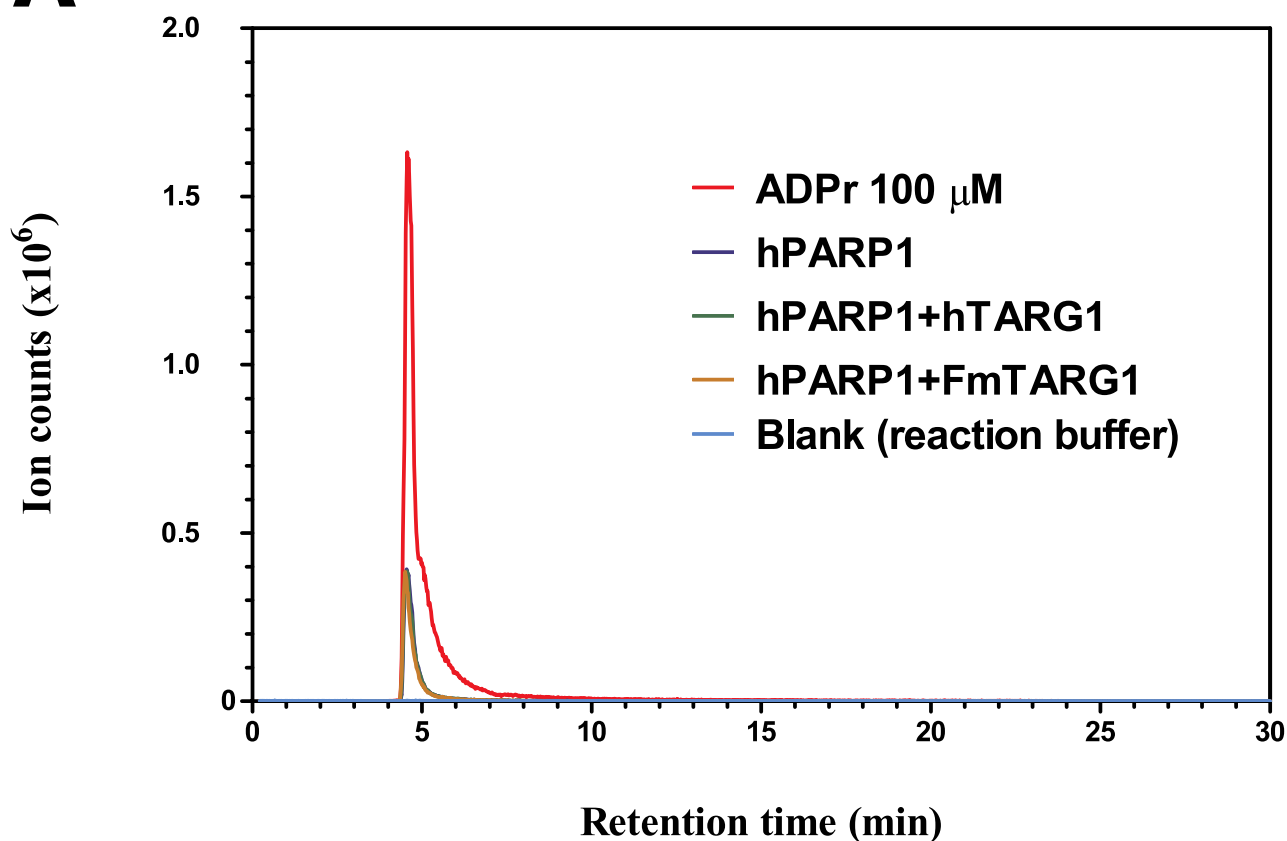**B**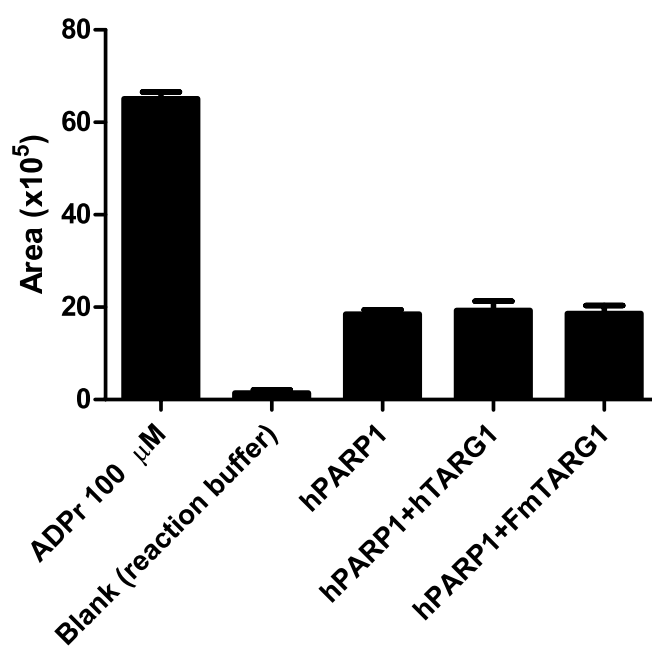

**Supplementary Figure S6.** Analysis of the reaction products of hTARG1 and FmTARG1 on poly(ADP-ribosyl)ated PARP1 by mass spectrometry. **(A)** Ion chromatograms of the monoisotopic mass of the ADP-ribose  $[M + H]^+$  adduct (560  $m/z$ ) obtained after the de-PARylation reactions catalyzed by FmTARG1 and hTARG1. **(B)** Area of mass 560.0 found in the different de-PARylation reactions. Error bars represent the standard deviation of three replicates. hPARP1 represents auto-PARylated hPARP1, whereas hPARP1+hTARG1 and hPARP1+FmTARG1 represent the de-PARylation reactions.
